# Supplementary material for: An actionable axis linking NFATc2 to EZH2 controls the EMT-like program of melanoma cells
Source: PubMed Central journal article supplement (PMC6756060; doi:10.1038/s41388-019-0729-2), 2019-02-01
Supplement: 41388_2019_729_MOESM2_ESM.pdf [file 41388_2019_729_MOESM2_ESM.pdf]

**Supplementary Table S1.**

Hierarchical clustering of correlation values (Spearman score) of the 312 ZEB1-correlated genes (rows, selected for  $r \geq 0.5$  with ZEB1) with SNAI1, NFATc2, CDH2, AXL, MITF and CDH1 (columns). Positive scores are highlighted in red, negative scores are highlighted in blue. Data were retrieved from the TCGA melanoma dataset at [www.cbioportal.org](http://www.cbioportal.org).

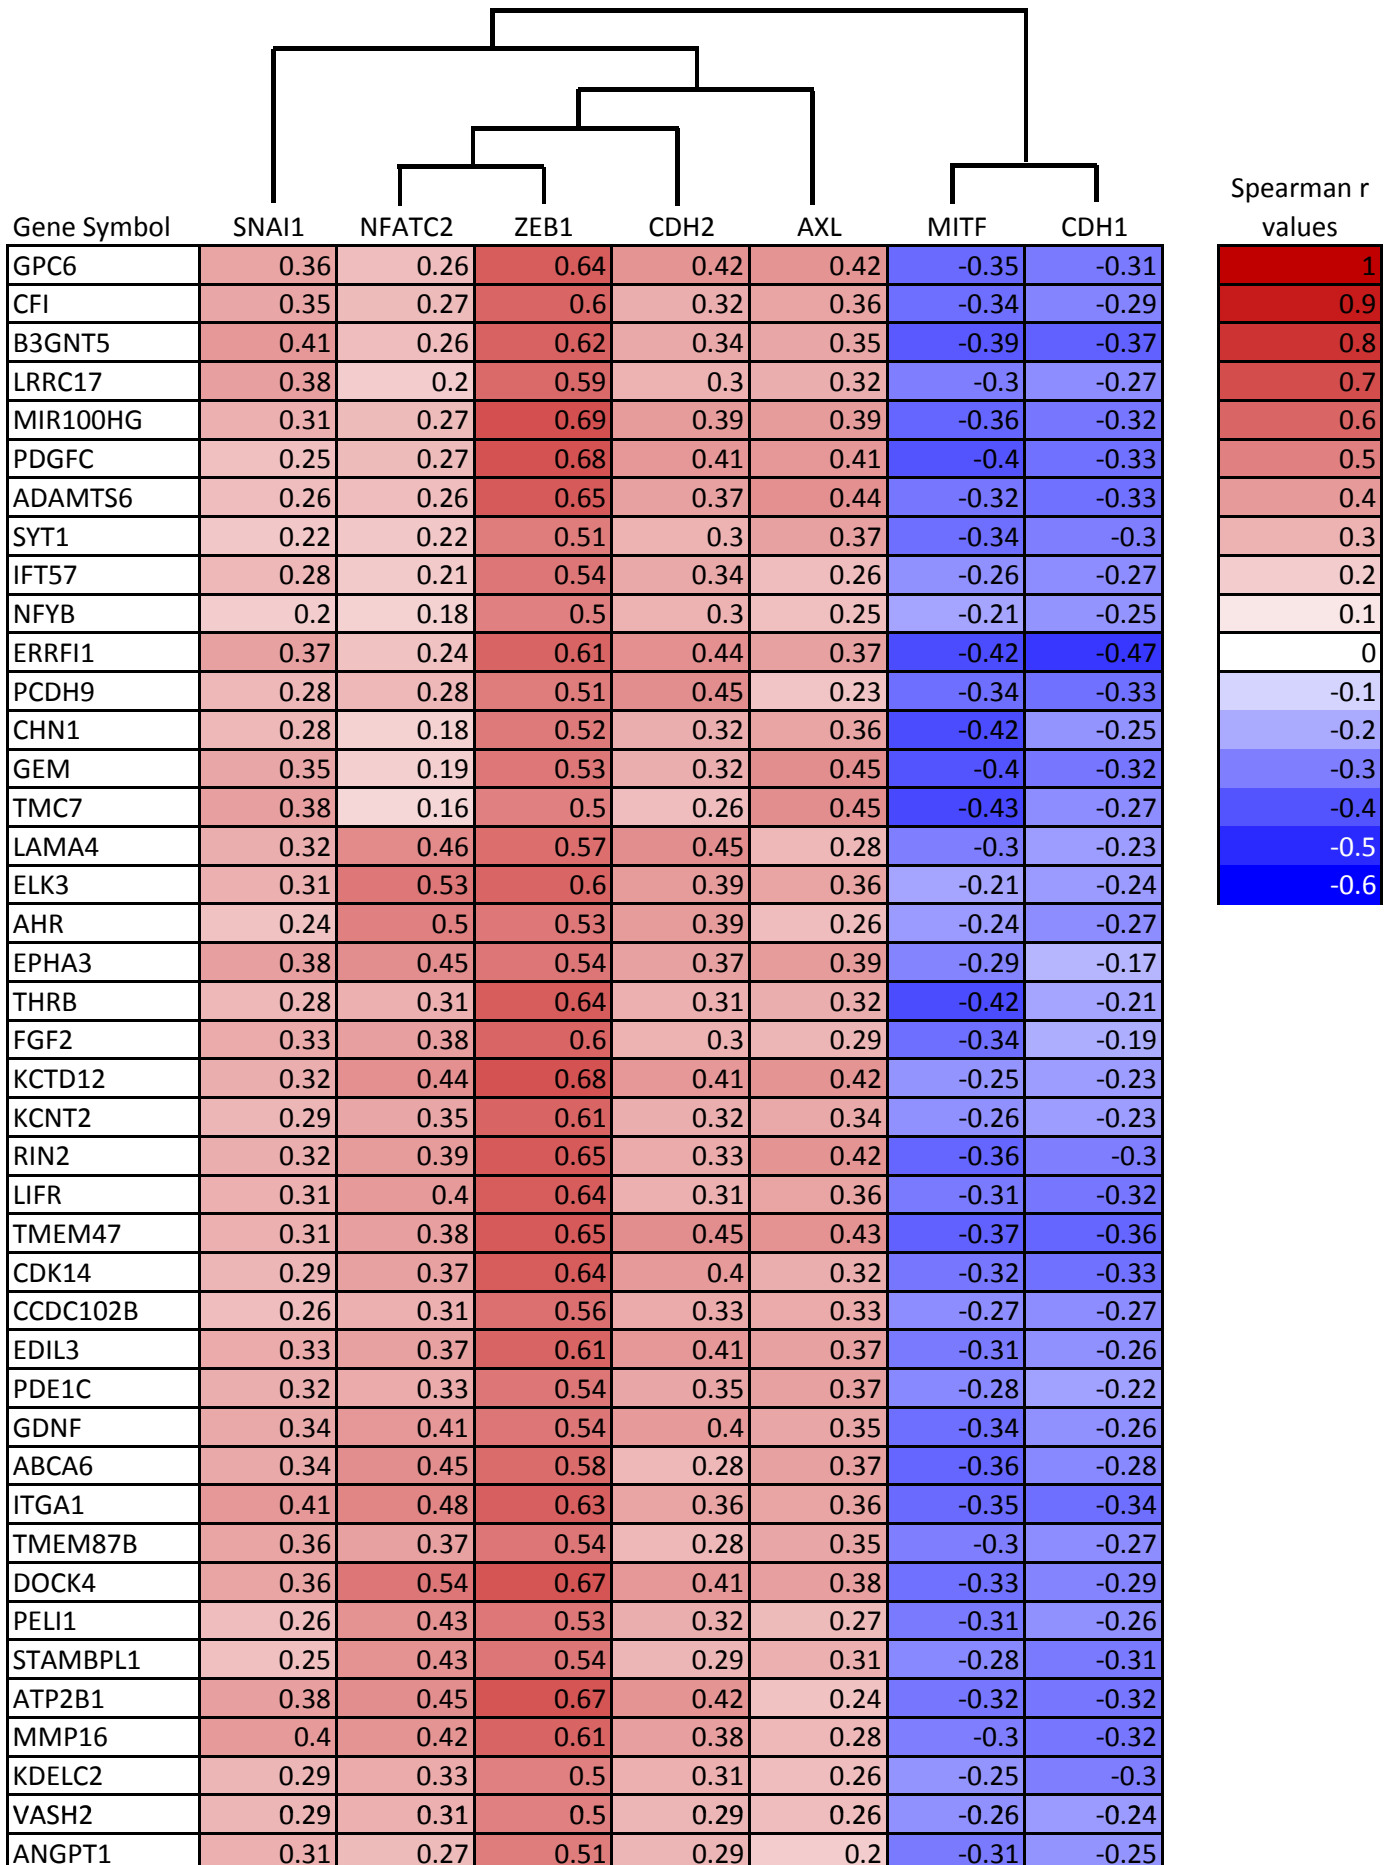

TABLE S1  
Page 2/6

|            |      |      |      |      |      |       |       |
|------------|------|------|------|------|------|-------|-------|
| GRIA2      | 0.29 | 0.28 | 0.5  | 0.28 | 0.19 | -0.29 | -0.26 |
| NEGR1      | 0.32 | 0.33 | 0.5  | 0.38 | 0.23 | -0.34 | -0.24 |
| CAVIN2     | 0.28 | 0.28 | 0.5  | 0.17 | 0.23 | -0.19 | -0.22 |
| AFAP1      | 0.33 | 0.4  | 0.53 | 0.34 | 0.37 | -0.4  | -0.42 |
| OSMR       | 0.34 | 0.41 | 0.54 | 0.28 | 0.45 | -0.37 | -0.29 |
| LOXL3      | 0.37 | 0.46 | 0.51 | 0.35 | 0.43 | -0.46 | -0.31 |
| TRPS1      | 0.15 | 0.28 | 0.59 | 0.42 | 0.48 | -0.43 | -0.42 |
| FAM241A    | 0.17 | 0.28 | 0.57 | 0.19 | 0.33 | -0.3  | -0.25 |
| PLCE1      | 0.23 | 0.33 | 0.64 | 0.42 | 0.45 | -0.4  | -0.28 |
| SCN9A      | 0.16 | 0.25 | 0.6  | 0.43 | 0.36 | -0.33 | -0.24 |
| ZEB1       | 0.35 | 0.43 | 1    | 0.47 | 0.45 | -0.41 | -0.4  |
| C5ORF58    | 0.16 | 0.33 | 0.57 | 0.34 | 0.33 | -0.29 | -0.24 |
| TENM1      | 0.17 | 0.25 | 0.5  | 0.25 | 0.29 | -0.24 | -0.19 |
| ARHGEF6    | 0.19 | 0.42 | 0.6  | 0.33 | 0.51 | -0.32 | -0.28 |
| DPYD       | 0.14 | 0.43 | 0.59 | 0.39 | 0.55 | -0.37 | -0.29 |
| MAP1B      | 0.13 | 0.3  | 0.52 | 0.3  | 0.4  | -0.34 | -0.19 |
| SLIT2      | 0.21 | 0.37 | 0.55 | 0.44 | 0.46 | -0.27 | -0.26 |
| CRIM1      | 0.23 | 0.35 | 0.55 | 0.37 | 0.48 | -0.36 | -0.33 |
| ZFPM2      | 0.23 | 0.29 | 0.52 | 0.31 | 0.39 | -0.26 | -0.25 |
| ST6GALNAC5 | 0.25 | 0.37 | 0.54 | 0.35 | 0.39 | -0.3  | -0.16 |
| NFE2L3     | 0.24 | 0.33 | 0.53 | 0.28 | 0.39 | -0.31 | -0.21 |
| SLC14A1    | 0.19 | 0.3  | 0.52 | 0.23 | 0.36 | -0.31 | -0.2  |
| CEP126     | 0.18 | 0.27 | 0.51 | 0.25 | 0.19 | -0.29 | -0.27 |
| DEPTOR     | 0.11 | 0.33 | 0.51 | 0.29 | 0.22 | -0.3  | -0.3  |
| LPAR1      | 0.46 | 0.48 | 0.65 | 0.27 | 0.4  | -0.43 | -0.2  |
| CPE        | 0.47 | 0.35 | 0.63 | 0.27 | 0.38 | -0.41 | -0.23 |
| EBF1       | 0.44 | 0.33 | 0.6  | 0.23 | 0.34 | -0.38 | -0.23 |
| MEOX2      | 0.5  | 0.34 | 0.52 | 0.23 | 0.32 | -0.35 | -0.2  |
| ADAMTS5    | 0.49 | 0.3  | 0.59 | 0.29 | 0.4  | -0.35 | -0.25 |
| HECW2      | 0.44 | 0.31 | 0.59 | 0.27 | 0.45 | -0.33 | -0.19 |
| VCAN       | 0.49 | 0.32 | 0.56 | 0.33 | 0.47 | -0.37 | -0.21 |
| S1PR3      | 0.5  | 0.32 | 0.52 | 0.22 | 0.46 | -0.36 | -0.23 |
| CLMP       | 0.41 | 0.32 | 0.52 | 0.23 | 0.47 | -0.31 | -0.22 |
| FLT1       | 0.48 | 0.41 | 0.58 | 0.29 | 0.42 | -0.33 | -0.27 |
| PLPP3      | 0.47 | 0.37 | 0.63 | 0.24 | 0.42 | -0.33 | -0.19 |
| TRPC6      | 0.42 | 0.34 | 0.52 | 0.22 | 0.34 | -0.25 | -0.16 |
| THSD7A     | 0.41 | 0.33 | 0.51 | 0.24 | 0.42 | -0.23 | -0.15 |
| TCF4       | 0.39 | 0.39 | 0.67 | 0.32 | 0.5  | -0.36 | -0.24 |
| PALLD      | 0.33 | 0.32 | 0.56 | 0.31 | 0.41 | -0.36 | -0.18 |
| NRP1       | 0.46 | 0.39 | 0.69 | 0.33 | 0.61 | -0.46 | -0.29 |
| MECOM      | 0.35 | 0.24 | 0.53 | 0.25 | 0.44 | -0.31 | -0.22 |
| MAP3K7CL   | 0.3  | 0.29 | 0.58 | 0.24 | 0.48 | -0.4  | -0.22 |
| ZNF204P    | 0.29 | 0.22 | 0.5  | 0.18 | 0.37 | -0.32 | -0.2  |
| EDNRA      | 0.43 | 0.19 | 0.54 | 0.26 | 0.42 | -0.34 | -0.18 |
| PRRX1      | 0.4  | 0.26 | 0.63 | 0.3  | 0.41 | -0.38 | -0.19 |
| TFPI       | 0.38 | 0.26 | 0.56 | 0.23 | 0.38 | -0.32 | -0.24 |
| TCEAL7     | 0.35 | 0.22 | 0.51 | 0.22 | 0.34 | -0.28 | -0.18 |
| TCIM       | 0.4  | 0.21 | 0.58 | 0.29 | 0.44 | -0.32 | -0.21 |
| LOX        | 0.38 | 0.23 | 0.5  | 0.28 | 0.4  | -0.28 | -0.2  |
| PLN        | 0.34 | 0.21 | 0.51 | 0.29 | 0.38 | -0.24 | -0.2  |
| DPYSL3     | 0.42 | 0.34 | 0.57 | 0.34 | 0.41 | -0.45 | -0.27 |
| SEMA3A     | 0.44 | 0.34 | 0.61 | 0.34 | 0.34 | -0.39 | -0.28 |
| ARHGAP6    | 0.32 | 0.3  | 0.52 | 0.3  | 0.31 | -0.35 | -0.27 |
| LPAR4      | 0.39 | 0.27 | 0.52 | 0.36 | 0.34 | -0.36 | -0.27 |

TABLE S1  
Page 3/6

|          |      |      |      |      |      |       |       |
|----------|------|------|------|------|------|-------|-------|
| ANKH     | 0.47 | 0.27 | 0.55 | 0.25 | 0.36 | -0.45 | -0.27 |
| TMEM100  | 0.43 | 0.28 | 0.54 | 0.26 | 0.4  | -0.43 | -0.25 |
| ADAMTS9  | 0.55 | 0.39 | 0.57 | 0.34 | 0.45 | -0.47 | -0.31 |
| GAP43    | 0.46 | 0.27 | 0.51 | 0.34 | 0.38 | -0.37 | -0.23 |
| CALCRL   | 0.35 | 0.33 | 0.61 | 0.28 | 0.44 | -0.26 | -0.16 |
| FGF7     | 0.31 | 0.33 | 0.61 | 0.3  | 0.42 | -0.25 | -0.19 |
| FILIP1   | 0.32 | 0.34 | 0.55 | 0.24 | 0.36 | -0.19 | -0.19 |
| PCDH17   | 0.35 | 0.35 | 0.59 | 0.36 | 0.41 | -0.22 | -0.15 |
| EPB41L2  | 0.29 | 0.4  | 0.54 | 0.32 | 0.4  | -0.22 | -0.14 |
| ANGPTL1  | 0.27 | 0.24 | 0.56 | 0.28 | 0.33 | -0.18 | -0.1  |
| FHL5     | 0.25 | 0.25 | 0.51 | 0.2  | 0.3  | -0.12 | -0.16 |
| C1QTNF3  | 0.37 | 0.27 | 0.57 | 0.29 | 0.22 | -0.21 | -0.14 |
| PCDH18   | 0.39 | 0.28 | 0.53 | 0.29 | 0.3  | -0.21 | -0.14 |
| RGS4     | 0.38 | 0.3  | 0.53 | 0.27 | 0.35 | -0.28 | -0.13 |
| FAM13C   | 0.34 | 0.24 | 0.53 | 0.24 | 0.32 | -0.24 | -0.11 |
| RASSF9   | 0.3  | 0.23 | 0.52 | 0.21 | 0.28 | -0.24 | -0.1  |
| KIAA0040 | 0.32 | 0.43 | 0.55 | 0.14 | 0.46 | -0.44 | -0.2  |
| PLAGL1   | 0.4  | 0.38 | 0.64 | 0.22 | 0.54 | -0.42 | -0.23 |
| SLC16A14 | 0.38 | 0.37 | 0.57 | 0.2  | 0.51 | -0.39 | -0.18 |
| PRTFDC1  | 0.36 | 0.28 | 0.55 | 0.15 | 0.47 | -0.33 | -0.21 |
| LGI2     | 0.36 | 0.37 | 0.57 | 0.18 | 0.42 | -0.33 | -0.16 |
| GUCY1A3  | 0.37 | 0.32 | 0.59 | 0.22 | 0.47 | -0.32 | -0.14 |
| CYYR1    | 0.36 | 0.28 | 0.58 | 0.18 | 0.45 | -0.27 | -0.13 |
| PDGFRA   | 0.35 | 0.28 | 0.53 | 0.22 | 0.45 | -0.33 | -0.09 |
| RASGRF2  | 0.35 | 0.27 | 0.55 | 0.2  | 0.51 | -0.3  | -0.16 |
| JCAD     | 0.37 | 0.26 | 0.51 | 0.19 | 0.5  | -0.33 | -0.12 |
| TGFB3    | 0.5  | 0.3  | 0.56 | 0.17 | 0.44 | -0.42 | -0.19 |
| MYCT1    | 0.4  | 0.22 | 0.51 | 0.14 | 0.41 | -0.29 | -0.11 |
| MEDAG    | 0.45 | 0.24 | 0.52 | 0.19 | 0.53 | -0.41 | -0.21 |
| SCARF1   | 0.44 | 0.32 | 0.51 | 0.15 | 0.54 | -0.36 | -0.17 |
| BCAT1    | 0.36 | 0.26 | 0.55 | 0.23 | 0.56 | -0.33 | -0.3  |
| DSE      | 0.34 | 0.27 | 0.53 | 0.26 | 0.58 | -0.43 | -0.24 |
| FAM131B  | 0.42 | 0.33 | 0.51 | 0.29 | 0.58 | -0.5  | -0.2  |
| PRDM8    | 0.28 | 0.32 | 0.53 | 0.22 | 0.57 | -0.42 | -0.18 |
| TLR2     | 0.26 | 0.31 | 0.5  | 0.16 | 0.54 | -0.34 | -0.2  |
| PTPRE    | 0.36 | 0.38 | 0.5  | 0.14 | 0.6  | -0.48 | -0.21 |
| ADGRL4   | 0.38 | 0.34 | 0.65 | 0.22 | 0.47 | -0.28 | -0.22 |
| ECM2     | 0.27 | 0.29 | 0.59 | 0.2  | 0.44 | -0.24 | -0.18 |
| COLEC12  | 0.31 | 0.31 | 0.57 | 0.21 | 0.45 | -0.29 | -0.25 |
| PIWIL4   | 0.24 | 0.28 | 0.5  | 0.16 | 0.35 | -0.26 | -0.18 |
| RHOA     | 0.34 | 0.43 | 0.62 | 0.22 | 0.49 | -0.33 | -0.26 |
| CD1D     | 0.24 | 0.36 | 0.51 | 0.21 | 0.46 | -0.28 | -0.24 |
| INHBA    | 0.35 | 0.29 | 0.58 | 0.38 | 0.52 | -0.33 | -0.22 |
| SULF1    | 0.31 | 0.27 | 0.53 | 0.32 | 0.54 | -0.24 | -0.16 |
| TMEM200A | 0.29 | 0.34 | 0.61 | 0.26 | 0.6  | -0.33 | -0.17 |
| SEL1L3   | 0.25 | 0.34 | 0.52 | 0.23 | 0.5  | -0.3  | -0.16 |
| HGF      | 0.36 | 0.35 | 0.6  | 0.31 | 0.56 | -0.32 | -0.2  |
| VGLL3    | 0.25 | 0.3  | 0.58 | 0.28 | 0.48 | -0.27 | -0.17 |
| LRRC4C   | 0.24 | 0.3  | 0.5  | 0.28 | 0.43 | -0.26 | -0.13 |
| CYP1B1   | 0.24 | 0.27 | 0.53 | 0.17 | 0.48 | -0.22 | -0.14 |
| NEXN     | 0.21 | 0.23 | 0.52 | 0.19 | 0.44 | -0.27 | -0.16 |
| NHS      | 0.28 | 0.22 | 0.51 | 0.28 | 0.52 | -0.32 | -0.17 |
| CALHM5   | 0.3  | 0.28 | 0.5  | 0.25 | 0.6  | -0.32 | -0.12 |
| CDH11    | 0.3  | 0.27 | 0.5  | 0.23 | 0.52 | -0.29 | -0.11 |

|            |      |      |      |      |      |       |       |
|------------|------|------|------|------|------|-------|-------|
| ABCC9      | 0.45 | 0.4  | 0.56 | 0.17 | 0.34 | -0.18 | -0.1  |
| KL         | 0.35 | 0.4  | 0.54 | 0.16 | 0.35 | -0.2  | -0.13 |
| SORL1      | 0.37 | 0.49 | 0.51 | 0.18 | 0.27 | -0.28 | -0.09 |
| FBN1       | 0.36 | 0.34 | 0.56 | 0.26 | 0.44 | -0.24 | -0.07 |
| TSHZ2      | 0.38 | 0.44 | 0.59 | 0.25 | 0.54 | -0.31 | -0.13 |
| CFH        | 0.26 | 0.35 | 0.52 | 0.22 | 0.4  | -0.26 | -0.1  |
| RARRES1    | 0.25 | 0.36 | 0.52 | 0.19 | 0.46 | -0.23 | -0.12 |
| NHSL2      | 0.4  | 0.4  | 0.5  | 0.18 | 0.43 | -0.27 | -0.12 |
| SYNPO2     | 0.34 | 0.34 | 0.5  | 0.14 | 0.39 | -0.25 | -0.08 |
| ITGA8      | 0.29 | 0.44 | 0.53 | 0.21 | 0.39 | -0.18 | -0.12 |
| ITGA4      | 0.33 | 0.38 | 0.52 | 0.26 | 0.44 | -0.16 | -0.16 |
| SGMS1      | 0.11 | 0.27 | 0.62 | 0.28 | 0.55 | -0.33 | -0.2  |
| CMAHP      | 0.14 | 0.27 | 0.56 | 0.19 | 0.47 | -0.24 | -0.16 |
| MAN1A1     | 0.21 | 0.42 | 0.59 | 0.24 | 0.57 | -0.23 | -0.14 |
| GCNT1      | 0.18 | 0.43 | 0.57 | 0.19 | 0.47 | -0.26 | -0.18 |
| ST8SIA4    | 0.19 | 0.38 | 0.6  | 0.24 | 0.63 | -0.31 | -0.23 |
| FAM105A    | 0.16 | 0.35 | 0.57 | 0.17 | 0.63 | -0.3  | -0.17 |
| ATP8B4     | 0.17 | 0.33 | 0.55 | 0.18 | 0.59 | -0.25 | -0.16 |
| SLC8A1     | 0.19 | 0.33 | 0.5  | 0.19 | 0.6  | -0.21 | -0.15 |
| CCDC170    | 0.2  | 0.32 | 0.53 | 0.12 | 0.53 | -0.24 | -0.14 |
| P2RY14     | 0.21 | 0.33 | 0.5  | 0.13 | 0.47 | -0.2  | -0.1  |
| TM6SF1     | 0.18 | 0.32 | 0.59 | 0.26 | 0.48 | -0.17 | -0.21 |
| GPR34      | 0.12 | 0.36 | 0.55 | 0.18 | 0.49 | -0.15 | -0.21 |
| RGS18      | 0.12 | 0.33 | 0.52 | 0.16 | 0.49 | -0.18 | -0.17 |
| TLR4       | 0.12 | 0.3  | 0.5  | 0.22 | 0.51 | -0.11 | -0.13 |
| ARHGEF3    | 0.09 | 0.31 | 0.54 | 0.14 | 0.44 | -0.21 | -0.06 |
| GLIPR1     | 0.28 | 0.33 | 0.66 | 0.27 | 0.63 | -0.46 | -0.29 |
| ANTXR2     | 0.25 | 0.27 | 0.59 | 0.33 | 0.52 | -0.42 | -0.26 |
| SLC9A7     | 0.24 | 0.34 | 0.52 | 0.29 | 0.5  | -0.4  | -0.22 |
| RTN1       | 0.2  | 0.37 | 0.56 | 0.3  | 0.64 | -0.4  | -0.24 |
| KCNMA1     | 0.2  | 0.33 | 0.53 | 0.26 | 0.62 | -0.43 | -0.24 |
| EMB        | 0.13 | 0.28 | 0.5  | 0.2  | 0.57 | -0.33 | -0.17 |
| COL8A1     | 0.29 | 0.26 | 0.55 | 0.43 | 0.57 | -0.37 | -0.28 |
| RUNX1      | 0.21 | 0.21 | 0.5  | 0.34 | 0.57 | -0.4  | -0.23 |
| RGS5       | 0.39 | 0.36 | 0.53 | 0.24 | 0.19 | -0.22 | -0.18 |
| FREM1      | 0.38 | 0.39 | 0.52 | 0.22 | 0.24 | -0.24 | -0.14 |
| PPP1R9A    | 0.29 | 0.35 | 0.5  | 0.26 | 0.11 | -0.17 | -0.12 |
| ATP2B1-AS1 | 0.44 | 0.34 | 0.52 | 0.29 | 0.17 | -0.36 | -0.28 |
| SPRY4      | 0.33 | 0.42 | 0.5  | 0.33 | 0.14 | -0.28 | -0.25 |
| TOP1       | 0.33 | 0.42 | 0.51 | 0.32 | 0.18 | -0.04 | -0.24 |
| MARCH1     | 0.25 | 0.4  | 0.54 | 0.2  | 0.5  | -0.04 | 0.01  |
| SLC40A1    | 0.18 | 0.38 | 0.5  | 0.05 | 0.36 | -0.12 | -0.07 |
| ZEB1-AS1   | 0.16 | 0.25 | 0.79 | 0.36 | 0.2  | -0.26 | -0.3  |
| ANKAR      | 0.17 | 0.27 | 0.53 | 0.19 | 0.13 | -0.11 | -0.18 |
| BACH1      | 0.23 | 0.5  | 0.62 | 0.43 | 0.37 | -0.24 | -0.29 |
| DIXDC1     | 0.18 | 0.39 | 0.56 | 0.41 | 0.35 | -0.22 | -0.29 |
| GOLIM4     | 0.18 | 0.36 | 0.54 | 0.39 | 0.28 | -0.13 | -0.29 |
| UBXN4      | 0.18 | 0.34 | 0.59 | 0.27 | 0.26 | -0.13 | -0.24 |
| CASC4      | 0.15 | 0.34 | 0.65 | 0.36 | 0.25 | -0.22 | -0.23 |
| PLOD2      | 0.14 | 0.24 | 0.51 | 0.32 | 0.19 | -0.21 | -0.2  |
| CMTM1      | 0.18 | 0.36 | 0.59 | 0.4  | 0.25 | -0.18 | -0.25 |
| LEPR       | 0.16 | 0.33 | 0.52 | 0.3  | 0.23 | -0.17 | -0.19 |
| HECTD2     | 0.1  | 0.31 | 0.63 | 0.38 | 0.28 | -0.23 | -0.36 |
| THAP2      | 0.12 | 0.32 | 0.56 | 0.41 | 0.21 | -0.18 | -0.32 |

|           |       |      |      |      |      |       |       |
|-----------|-------|------|------|------|------|-------|-------|
| BIRC2     | 0.08  | 0.32 | 0.5  | 0.32 | 0.22 | -0.15 | -0.33 |
| POGLUT1   | 0.16  | 0.25 | 0.55 | 0.35 | 0.23 | -0.16 | -0.27 |
| PXYLP1    | 0.19  | 0.25 | 0.54 | 0.4  | 0.28 | -0.24 | -0.31 |
| ZFP37     | 0.16  | 0.28 | 0.52 | 0.38 | 0.23 | -0.22 | -0.33 |
| MSANTD4   | 0.17  | 0.28 | 0.54 | 0.3  | 0.12 | -0.13 | -0.25 |
| ETV1      | 0.15  | 0.35 | 0.55 | 0.32 | 0.12 | -0.11 | -0.19 |
| ARRDC3    | 0.16  | 0.31 | 0.53 | 0.38 | 0.19 | -0.1  | -0.22 |
| TMEM167A  | 0.12  | 0.27 | 0.51 | 0.35 | 0.12 | -0.08 | -0.18 |
| ARID4B    | 0.07  | 0.43 | 0.56 | 0.32 | 0.19 | -0.07 | -0.3  |
| USP34     | 0.1   | 0.37 | 0.52 | 0.28 | 0.17 | -0.08 | -0.25 |
| HSPA13    | 0.12  | 0.33 | 0.54 | 0.37 | 0.25 | -0.07 | -0.26 |
| SOCS5     | 0.09  | 0.34 | 0.54 | 0.36 | 0.22 | -0.1  | -0.29 |
| CCP110    | 0.08  | 0.31 | 0.52 | 0.33 | 0.2  | -0.07 | -0.25 |
| PPP1R12A  | 0.14  | 0.39 | 0.57 | 0.36 | 0.23 | -0.07 | -0.23 |
| ATF1      | 0.13  | 0.31 | 0.5  | 0.28 | 0.19 | -0.07 | -0.2  |
| RGPD4     | 0.15  | 0.36 | 0.5  | 0.26 | 0.19 | -0.08 | -0.22 |
| SMC5      | 0.13  | 0.32 | 0.5  | 0.28 | 0.16 | -0.08 | -0.24 |
| MIS18BP1  | 0.13  | 0.3  | 0.51 | 0.28 | 0.17 | -0.02 | -0.22 |
| SP3       | 0.17  | 0.36 | 0.5  | 0.32 | 0.2  | -0.05 | -0.28 |
| DNAJC10   | 0.22  | 0.32 | 0.52 | 0.31 | 0.17 | -0.04 | -0.23 |
| GABPB1    | 0.22  | 0.31 | 0.51 | 0.31 | 0.23 | -0.12 | -0.31 |
| SACS      | 0.18  | 0.3  | 0.51 | 0.35 | 0.17 | -0.1  | -0.3  |
| CWC22     | 0.17  | 0.26 | 0.51 | 0.31 | 0.17 | -0.08 | -0.31 |
| ITGB1     | 0.04  | 0.2  | 0.55 | 0.38 | 0.3  | -0.1  | -0.32 |
| UFM1      | 0.09  | 0.2  | 0.5  | 0.35 | 0.21 | -0.1  | -0.29 |
| C16ORF52  | 0.12  | 0.25 | 0.52 | 0.42 | 0.14 | -0.16 | -0.35 |
| PIBF1     | 0.14  | 0.25 | 0.54 | 0.36 | 0.13 | -0.07 | -0.32 |
| GORAB     | 0.12  | 0.24 | 0.52 | 0.32 | 0.11 | -0.06 | -0.26 |
| CEP290    | 0.08  | 0.23 | 0.52 | 0.28 | 0.15 | -0.09 | -0.28 |
| ZNF639    | 0.1   | 0.18 | 0.5  | 0.3  | 0.15 | -0.11 | -0.3  |
| JMJD1C    | -0.02 | 0.31 | 0.57 | 0.36 | 0.3  | -0.12 | -0.33 |
| RUFY2     | -0.03 | 0.2  | 0.5  | 0.22 | 0.2  | -0.08 | -0.26 |
| SEC62     | 0.03  | 0.25 | 0.52 | 0.27 | 0.22 | -0.01 | -0.22 |
| PHACTR2   | 0.21  | 0.46 | 0.61 | 0.35 | 0.38 | -0.21 | -0.17 |
| STARD4    | 0.2   | 0.35 | 0.51 | 0.23 | 0.27 | -0.19 | -0.16 |
| ENPP4     | 0.17  | 0.31 | 0.58 | 0.23 | 0.3  | -0.2  | -0.18 |
| NTN4      | 0.2   | 0.3  | 0.56 | 0.24 | 0.33 | -0.23 | -0.19 |
| RAP1A     | 0.17  | 0.34 | 0.52 | 0.24 | 0.36 | -0.23 | -0.21 |
| RORA      | 0.15  | 0.29 | 0.5  | 0.16 | 0.26 | -0.22 | -0.12 |
| CD302     | 0.23  | 0.41 | 0.52 | 0.21 | 0.29 | -0.19 | -0.24 |
| SLC12A6   | 0.12  | 0.38 | 0.5  | 0.24 | 0.34 | -0.29 | -0.15 |
| DOCK11    | 0.14  | 0.47 | 0.57 | 0.27 | 0.41 | -0.2  | -0.14 |
| RGPD1     | 0.14  | 0.37 | 0.52 | 0.19 | 0.29 | -0.11 | -0.17 |
| HCFC2     | 0.07  | 0.33 | 0.51 | 0.23 | 0.28 | -0.12 | -0.14 |
| ITPR1     | 0.09  | 0.31 | 0.5  | 0.24 | 0.29 | -0.15 | -0.14 |
| FUT8      | 0.14  | 0.34 | 0.61 | 0.39 | 0.42 | -0.22 | -0.19 |
| FNDC3B    | 0.2   | 0.32 | 0.57 | 0.35 | 0.4  | -0.17 | -0.25 |
| CPED1     | 0.15  | 0.26 | 0.53 | 0.32 | 0.39 | -0.14 | -0.2  |
| UHRF1BP1L | 0.09  | 0.34 | 0.59 | 0.31 | 0.32 | -0.16 | -0.25 |
| ZCCHC6    | 0.11  | 0.32 | 0.53 | 0.31 | 0.37 | -0.17 | -0.24 |
| RAP2C     | 0.13  | 0.28 | 0.54 | 0.29 | 0.32 | -0.19 | -0.24 |
| TANK      | 0.11  | 0.3  | 0.52 | 0.3  | 0.32 | -0.21 | -0.27 |
| MCL1      | 0.08  | 0.32 | 0.5  | 0.34 | 0.42 | -0.2  | -0.23 |
| SMURF2    | 0.06  | 0.31 | 0.5  | 0.4  | 0.36 | -0.17 | -0.29 |

|          |       |      |      |      |      |       |       |
|----------|-------|------|------|------|------|-------|-------|
| SKIL     | 0.09  | 0.3  | 0.57 | 0.4  | 0.35 | -0.09 | -0.23 |
| STAM2    | 0.06  | 0.27 | 0.5  | 0.29 | 0.26 | -0.06 | -0.21 |
| SPOPL    | 0.02  | 0.35 | 0.55 | 0.34 | 0.31 | -0.15 | -0.24 |
| KIAA0825 | 0.07  | 0.32 | 0.53 | 0.36 | 0.29 | -0.13 | -0.21 |
| GOLPH3   | 0.04  | 0.29 | 0.5  | 0.3  | 0.25 | -0.1  | -0.14 |
| CMTM6    | 0.09  | 0.29 | 0.5  | 0.24 | 0.34 | -0.09 | -0.21 |
| GALNT4   | 0.03  | 0.33 | 0.5  | 0.24 | 0.31 | -0.16 | -0.22 |
| NAIP     | 0.01  | 0.31 | 0.5  | 0.27 | 0.33 | -0.15 | -0.22 |
| UTRN     | 0     | 0.34 | 0.5  | 0.3  | 0.35 | -0.15 | -0.13 |
| DDHD1    | 0.04  | 0.17 | 0.5  | 0.23 | 0.25 | -0.14 | -0.12 |
| P2RY1    | 0.19  | 0.39 | 0.53 | 0.46 | 0.33 | -0.2  | -0.18 |
| ITGA2    | 0.11  | 0.42 | 0.5  | 0.4  | 0.34 | -0.23 | -0.12 |
| CREB5    | 0.13  | 0.33 | 0.51 | 0.43 | 0.19 | -0.22 | -0.17 |
| KDM7A    | 0.13  | 0.5  | 0.56 | 0.31 | 0.24 | -0.14 | -0.19 |
| CEP85L   | 0.13  | 0.43 | 0.59 | 0.31 | 0.21 | -0.13 | -0.21 |
| NFAT5    | 0.1   | 0.39 | 0.51 | 0.28 | 0.13 | -0.12 | -0.15 |
| ATP11C   | 0.1   | 0.42 | 0.58 | 0.35 | 0.27 | -0.1  | -0.22 |
| XIAP     | 0.08  | 0.39 | 0.56 | 0.28 | 0.24 | -0.09 | -0.2  |
| MANEA    | 0.05  | 0.34 | 0.55 | 0.3  | 0.26 | -0.07 | -0.19 |
| SCAF11   | 0.11  | 0.43 | 0.56 | 0.3  | 0.27 | -0.04 | -0.22 |
| ZNF41    | 0.05  | 0.44 | 0.53 | 0.34 | 0.19 | -0.05 | -0.2  |
| SP4      | 0.05  | 0.47 | 0.53 | 0.31 | 0.23 | -0.04 | -0.22 |
| ITGAV    | 0.06  | 0.38 | 0.54 | 0.37 | 0.25 | -0.01 | -0.19 |
| AKAP11   | 0.04  | 0.35 | 0.56 | 0.34 | 0.22 | 0     | -0.2  |
| ZNF148   | 0.02  | 0.35 | 0.51 | 0.31 | 0.19 | -0.01 | -0.22 |
| CEP120   | -0.01 | 0.37 | 0.55 | 0.31 | 0.28 | -0.06 | -0.22 |
| FAM208A  | 0     | 0.34 | 0.51 | 0.33 | 0.23 | -0.05 | -0.22 |
| SLC5A3   | 0.08  | 0.42 | 0.55 | 0.36 | 0.26 | -0.15 | -0.25 |
| RASA1    | 0.03  | 0.39 | 0.54 | 0.35 | 0.24 | -0.14 | -0.28 |
| MTX3     | 0.02  | 0.31 | 0.52 | 0.38 | 0.15 | -0.14 | -0.24 |
| LIMS1    | 0.15  | 0.38 | 0.5  | 0.31 | 0.31 | -0.06 | -0.21 |
| ATRX     | -0.01 | 0.42 | 0.54 | 0.31 | 0.14 | 0.02  | -0.19 |
| ARID4A   | -0.01 | 0.34 | 0.51 | 0.28 | 0.14 | 0.03  | -0.19 |
| NAB1     | 0.05  | 0.34 | 0.54 | 0.34 | 0.1  | -0.05 | -0.2  |
| GABPA    | 0.04  | 0.3  | 0.52 | 0.31 | 0.15 | -0.02 | -0.23 |
| SEN7     | 0.01  | 0.32 | 0.51 | 0.3  | 0.1  | -0.01 | -0.22 |
| FAM214A  | 0.05  | 0.33 | 0.52 | 0.2  | 0.11 | -0.05 | -0.18 |
| CTDSPL2  | 0.12  | 0.37 | 0.51 | 0.34 | 0.08 | 0.01  | -0.21 |
| PDS5B    | 0.12  | 0.4  | 0.5  | 0.41 | 0.16 | 0     | -0.25 |
| VPS13C   | -0.01 | 0.47 | 0.54 | 0.22 | 0.23 | -0.02 | -0.09 |
| DENND4A  | -0.02 | 0.48 | 0.56 | 0.27 | 0.29 | -0.03 | -0.18 |
| NR3C1    | -0.01 | 0.46 | 0.53 | 0.26 | 0.25 | -0.07 | -0.18 |
| CCDC186  | 0     | 0.39 | 0.51 | 0.23 | 0.21 | -0.04 | -0.2  |
| AFTPH    | 0     | 0.41 | 0.51 | 0.21 | 0.25 | -0.11 | -0.15 |
| CCPG1    | -0.03 | 0.34 | 0.5  | 0.18 | 0.22 | -0.07 | -0.11 |
| MBNL1    | -0.04 | 0.31 | 0.51 | 0.25 | 0.23 | -0.08 | -0.16 |
| KIAA1551 | 0.08  | 0.45 | 0.5  | 0.15 | 0.23 | -0.07 | -0.17 |
| RSPRY1   | 0.13  | 0.42 | 0.51 | 0.34 | 0.18 | -0.02 | -0.13 |
| ARL15    | 0.09  | 0.36 | 0.51 | 0.3  | 0.2  | -0.04 | -0.05 |
| CAB39    | 0.1   | 0.39 | 0.51 | 0.23 | 0.25 | 0     | -0.11 |
| UBR1     | 0.05  | 0.42 | 0.5  | 0.26 | 0.19 | 0.06  | -0.1  |
| LMBRD2   | -0.02 | 0.42 | 0.5  | 0.29 | 0.17 | 0.02  | -0.1  |
| IL6ST    | 0.01  | 0.57 | 0.5  | 0.29 | 0.2  | 0.04  | -0.16 |
| MIA2     | 0.01  | 0.19 | 0.51 | 0.25 | 0.22 | 0.13  | 0     |

**Table S2. Upstream regulator analysis by IPA on differentially expressed genes in Me71 NFATc2-shRNA\_86a transfectant compared to two control transfectants**

**A. NFATc2 shRNA\_86a compared to Control\_shRNA\_1**

| Upstream Regulator | Log Ratio | Molecule Type           | Predicted Activation State | Activation z-score | p-value of overlap | Target molecules in dataset                                                                                                                                                                                                                                                                                                                                                                                                                                                                                                                                                                                                                                                                                                                                                                                                                                                                                                                                                                                                                                                                                                                                                                                                                                                                                                                                                                                                                                                                                                                                                                                                                                                                                                                                                                           |
|--------------------|-----------|-------------------------|----------------------------|--------------------|--------------------|-------------------------------------------------------------------------------------------------------------------------------------------------------------------------------------------------------------------------------------------------------------------------------------------------------------------------------------------------------------------------------------------------------------------------------------------------------------------------------------------------------------------------------------------------------------------------------------------------------------------------------------------------------------------------------------------------------------------------------------------------------------------------------------------------------------------------------------------------------------------------------------------------------------------------------------------------------------------------------------------------------------------------------------------------------------------------------------------------------------------------------------------------------------------------------------------------------------------------------------------------------------------------------------------------------------------------------------------------------------------------------------------------------------------------------------------------------------------------------------------------------------------------------------------------------------------------------------------------------------------------------------------------------------------------------------------------------------------------------------------------------------------------------------------------------|
| TBX2               | 0.298     | transcription regulator | Inhibited                  | -5.020             | 3.00E-13           | ANLN,ASF1B,AURKA,AURKB,BHLHE40,BUB1,CCNA2,CCNL1,CCNL2,CDCG,CDCA3,CDCA5,CDH1,CDK1,CDKN1A,CDT1,CHAF1B,CHEK1,CKAP2,CKS1B,DDIT3,DNMT1,E2F7,E2F8,EZH2,FAM120B,FOXO1,HAUS1,HELLS,LIG1,MAD2L1,MCM2,MCM4,MCM5,MCM7,MED20,MXD3,NCAPD2,NCAPG2,PAR6A,PCGF6,PKMYT1,PLK1,RBL1,SGOL1,SMC2,SRF,TCEA2,TIPIN,TYRP1,ZNF329                                                                                                                                                                                                                                                                                                                                                                                                                                                                                                                                                                                                                                                                                                                                                                                                                                                                                                                                                                                                                                                                                                                                                                                                                                                                                                                                                                                                                                                                                              |
| FOXO1              | -0.882    | transcription regulator | Inhibited                  | -4.166             | 2.15E-06           | ADAM17,ANXA1,ATF2,AURKB,BIRC5,BUB1B,CAV1,CCNA2,CCNB1,CCNB2,CCND1,CCNE2,CCNF,CCO20,CCO25A,CCO25B,CDH1,CDH2,CDK1,CDKN1A,CDKN3,CENPA,CENPF,CKS1B,FOXO1,GTSE1,KDR,KIF20A,MYC,NEK2,PLK1,PLK4,SKP2,SNAI2,STMN1,TJP1,TP53,ZEB2                                                                                                                                                                                                                                                                                                                                                                                                                                                                                                                                                                                                                                                                                                                                                                                                                                                                                                                                                                                                                                                                                                                                                                                                                                                                                                                                                                                                                                                                                                                                                                               |
| MYC                | -0.517    | transcription regulator | Inhibited                  | -3.998             | 1.70E-12           | ACSL4,ACTN1,ACTN4,ADARB1,ADD1,ADK,ADM,AK2,AKAP12,ALCAM,AMD1,ANGPT1,ARL6IP1,ASNS,ATP1F1,AURKB,BAX,BCKDHB,BCL2,BCL2A1,BCL2L1,BIN1,BIRC2,BIRC5,BMI1,BCRA1,BRD2,BUB1,BUB1B,CANX,CASP1,CASP9,CAV1,CCNA2,CCNB1,CCNB2,CCND1,CCND3,CCNE2,CCNG2,CD44,CD47,CD9,CCO20,CCO25A,CCO25B,CCO25C,CDH1,CDH2,CDK1,CDK6,CDK7,CDKN1A,CFLAR,CHEK1,CHKA,CKS2,COL15A1,COL4A2,COL5A2,COL6A3,COX5B,COX6A1,CPD,CPT1A,CPT2,CRIP2,CRYAB,CSDE1,CSR2,CSTB,CTNNB1,CTSB,CTSD,CTSV,CUL1,CYFIP2,DBN1,DDIT3,DDX18,DDX5,DDFB,DKK1,DLEU2,DNMT1,DNPH1,DSTN,DUSP6,E2F2,E2F3,ECM1,EED,EGR1,EIF2B4,EIF2S2,EIF3D,EIF4A1,EIF4G1,EMP1,ENO1,EXOSC8,EZH2,F2R,FABP5,FAM129A,FAP,FBL,FBLN5,FBXO32,FCGRT,FN1,FOSL1,FOXO1,FSTL1,FTH1,FXD1,GAA,GABARAP,GADD45A,GAMT,GAPDH,GAR1,GCLC,GCLM,GCSH,GGH,GLG1,GLS,GLUD1,GOLGA2,GOT2,GTTF2,H2AFZ,HAS2,HBE1,HIST1H4A (includes others),HK2,HLA-B,HLA-E,HMGN2,HMOX1,HNRNP1A,HNRNPAB,HSPA14,HSPA1A/HSPA1B,HSPB1,HSPD1,HSPE1,ICAM1,ID2,ID3,IER3,IFI35,IFIT1,IL10,IL1RAP,IL8,IMPA2,IREB2,IRF7,IRF9,ITGA6,ITGB1,KDR,KLF10,KLF4,KLF6,LAMB2,LDHA,LIN28B,LSM4,LXN,MA2L1,MAN2A1,MAT2A,MBP,MCM5,MCM7,MGAT1,MIF,MINA,MITF,MKI67,MOGS,MRE11A,MRPL12,MSH2,MSN,MTBP,MTFR2,MTHFD1,MYC,MYO1C,NBN,NCL,NDEL1,NDRG1,NDRG2,NFATC3,NGFRAP1,NME1,NME2,NOP56,OAS1,ODC1,OLIG1,PAICS,PAM,PCNA,PERP,PFKFB3,PFKL,PFKM,PFKP,PGAM1,PGK1,PHB,PKM,PLA1A,PLAUR,PLK1,PMP22,PNCK,POLD1,POLR1B,PPP1R15A,PRDX3,PREP,PRKACB,PRMT1,PRODH,PROM1,PSAT1,PTEN,RAD51,RANBP1,RARA,RBBP4,RCC1,RHOB,ROCK2,RPL13,RPL21,RPS15A,RPS18,RRM2,RRM2B,RRS1,RTN2,RUVBL2,SAT1,SCPEP1,SDCBP,SEPHS2,SFRP1,SGK1,SHMT1,SKP2,SLC25A19,SLC2A3,SLC3A2,SLC7A5,SNRPC,SNRPD1,SNRPN,SOD2,SOX6,SP3,SPN,SPP1,ST3GAL1,ST3GAL3,STMN1,TAGLN2,TES,TF,TFDP1,THBS1,TMEM97,TMSB10/TMSB4X,TNC,TNFRSF10B,TP53,TP53I3,TPD52,TRIP12,TSPAN7,TYMS,UBE2C,UXT,VAMP3,XRCC3,YRDC,ZFP36,ZFP36L1,ZIC2,ZXDB |
| E2F1               |           | transcription regulator | Inhibited                  | -3.726             | 8.85E-20           | AMY2A,AURKA,AURKB,BAX,BCL2,BCL2L1,BIRC5,BMI1,BMP4,BOK,BCRA1,BUB3,CALD1,CALM1 (includes others),CASP7,CASP9,CAV1,CBX5,CCNA2,CCNB1,CCNB2,CCND1,CCND3,CCNE2,CCNO,CD9,CCO25A,CDK1,CDKN1A,CDKN2D,CFLAR,CHEK1,CHEK2,CLIC1,COPB8,COX7C,CRAP2,CRYAB,CSDE1,CTNNB1P1,CTSB,DBF4,DDAH2,DGKI,DHFR,DLEU2,DNMT1,DUSP10,DUSP4,DUT,E2F2,E2F3,E2F4,ECT2,EED,EGR1,EIF31,ENO2,EXOSC9,EYA4,EZH2,FBXO5,FEN1,FGFR1,FHIT,FOXO1,GMNN,GPS2,H19,HADHA,HELLS,HES1,HIST1H2AC,HIST1H2B/HIST1H2BK,HIST1H4A (includes others),HIST2H2AA3/HIST2H2AA4,HLTF,HMGB1,HMGB2,HRK,HSPA1A/HSPA1B,HSPE1,ICAM1,ID3,IRS1,JMY,KDR,KIAA101,KIF23,KRT10,LACTB,MAD2L1,MAF,MAP3K14,MAP3K5,MCL1,MCM10,MCM2,MCM4,MCM5,MCM7,MEIS1,MH1,MMP16,MSH2,MT1G,MTHFD1,MYB,MYC,NCL,NCOA3,NDC80,NRIP1,NRP1,PA2G4,PAWR,PCNA,PHB,PMPCB,POLA2,POLD1,PPP1R13B,PPP1R8,PRDM2,PRIM2,PRKDC,PSAT1,PSMB9,PTPN4,RACGAP1,RAD51,RANBP1,RBBP4,RBBP8,RBL1,RFC2,RFC3,RFC4,RPA3,RRM1,RRM2,SIVA1,SLC3A2,SMC4,SNRPC,SOD2,STAM,STMN1,TAP2,TAPBP,TK1,TOP2A,TOP2B,TP53,TP53BP2,TP53INP1,TRAF2,TYMS,UNG,UXT,YWHAE,ZFP36,ZNF160,ZNF2                                                                                                                                                                                                                                                                                                                                                                                                                                                                                                                                                                                                                                                                                                                                                          |
| E2F3               | -0.243    | transcription regulator | Inhibited                  | -3.568             | 3.11E-08           | BIRC5,BMI1,BOK,CCNA2,CCNB1,CCND1,CCND3,CCO25A,CCO25B,CCO25C,CDK1,CDKN1A,DHFR,E2F2,E2F3,EED,EZH2,FBXO5,MCM10,MCM2,MCM4,MCM5,MCM7,MLH1,MT1G,MYB,MYC,PCNA,POLA2,PPP1R13B,PPP1R8,RAD51,RBL1,RRM1,STAG3,TK1,TOP2B,TP53BP2,UXT                                                                                                                                                                                                                                                                                                                                                                                                                                                                                                                                                                                                                                                                                                                                                                                                                                                                                                                                                                                                                                                                                                                                                                                                                                                                                                                                                                                                                                                                                                                                                                              |
| EZH2               | -0.935    | transcription regulator | Inhibited                  | -3.067             | 1.69E-02           | AADAT,AMACR,APPBP2,AXIN2,BCL2,BCL2L1,BIRC3,BMP4,BCRA1,CCND1,CCND3,CCNE2,CD82,CDH1,CDK6,CDKN1A,CPD,CTNNB1,CX3CL1,CXCL1,DDT,DKK1,EFNA1,EZH2,FBLN1,FHOD3,FOXF2,FRZB,FUCA1,GDF15,GSTM4,HOXB13,HOXB5,HOXB6,ICAM1,ICOSLG,IGFBP3,IL24,IL6,IL8,ITGA1,KIAA1199,KLF4,MAL2,MYC,MZF1,NME5,OXTR,PAX3,PER1,PIM2,PKMYT1,PLA2G4A,PPP2R2B,PTGES,PTGS2,RAC3,RAP1GAP,SATB1,SCAMP2,TBX3,TP53,TRIM38,ZMYM4                                                                                                                                                                                                                                                                                                                                                                                                                                                                                                                                                                                                                                                                                                                                                                                                                                                                                                                                                                                                                                                                                                                                                                                                                                                                                                                                                                                                                 |
| E2F2               | -0.299    | transcription regulator | Inhibited                  | -2.778             | 1.45E-08           | AMY2A,BCL2,BIRC5,BMI1,CCNA2,CCNB1,CCND1,CCND3,CCO25A,CCO25B,CCO25C,CDK1,CDKN1A,CDKN2D,DHFR,E2F3,EED,EZH2,JMY,MCM10,MCM2,MCM4,MCM5,MCM7,MLH1,MT1G,MYB,MYC,PCNA,RAD51,RBL1,RRM2,TP53,UXT                                                                                                                                                                                                                                                                                                                                                                                                                                                                                                                                                                                                                                                                                                                                                                                                                                                                                                                                                                                                                                                                                                                                                                                                                                                                                                                                                                                                                                                                                                                                                                                                                |
| SREBF2             |           | transcription regulator | Inhibited                  | -2.595             | 1.05E-04           | AACS,ABCA1,ACSL1,ACSS2,ALDOC,CDKN1A,CYP51A1,DHCR7,EBP,FABP5,FABP6,FDFT1,G6PD,GTTF2,HES6,HMGCS1,HSD17B1,JDH1,IDI1,INSIG1,LDLR,LSS,MSMO1,MVK,NSDHL,PLIN2,RDH11,SCSD,SCD,SQLE,SREBF1,TFF3,TM7SF2,TMEM97                                                                                                                                                                                                                                                                                                                                                                                                                                                                                                                                                                                                                                                                                                                                                                                                                                                                                                                                                                                                                                                                                                                                                                                                                                                                                                                                                                                                                                                                                                                                                                                                  |
| MBD2               |           | transcription regulator | Inhibited                  | -2.469             | 6.61E-02           | AMY1A (includes others), ATP5I,BIRC3,BCRA1,CDH1,CDKN1A,CENPH,CKS2,G6PD,HK2,MEF2A,MGMT,NBR2,NEIL3,ORC6,PLA2G16,PLK1,POLB,PTPN4,RELB,TFF2                                                                                                                                                                                                                                                                                                                                                                                                                                                                                                                                                                                                                                                                                                                                                                                                                                                                                                                                                                                                                                                                                                                                                                                                                                                                                                                                                                                                                                                                                                                                                                                                                                                               |
| RCAN1              | 0.269     | transcription regulator | Inhibited                  | -2.401             | 3.38E-01           | CCNA2,CCNF,ICAM1,IL6,NOS3,PTGS2,RCAN1                                                                                                                                                                                                                                                                                                                                                                                                                                                                                                                                                                                                                                                                                                                                                                                                                                                                                                                                                                                                                                                                                                                                                                                                                                                                                                                                                                                                                                                                                                                                                                                                                                                                                                                                                                 |
| KLF5               |           | transcription regulator | Inhibited                  | -2.385             | 1.64E-01           | ACADM,BIRC5,CCND1,CDK1,CDKN1A,CDT1,CTNNB1,E2F3,FAM110A,LAMA1,MYC,NOTCH1,PCNA,PPARG,TBC1D14,WFS1                                                                                                                                                                                                                                                                                                                                                                                                                                                                                                                                                                                                                                                                                                                                                                                                                                                                                                                                                                                                                                                                                                                                                                                                                                                                                                                                                                                                                                                                                                                                                                                                                                                                                                       |
| TLX1               |           | transcription regulator | Inhibited                  | -2.236             | 5.51E-01           | CDG6,CHEK1,KDR,MCL1,MYB,PCNA,RAD51                                                                                                                                                                                                                                                                                                                                                                                                                                                                                                                                                                                                                                                                                                                                                                                                                                                                                                                                                                                                                                                                                                                                                                                                                                                                                                                                                                                                                                                                                                                                                                                                                                                                                                                                                                    |
| MYBL2              |           | transcription regulator | Inhibited                  | -2.140             | 9.58E-03           | BCL2,BCL2L1,BIRC3,BIRC5,CCNA2,CCNB1,CCNB2,CCND1,CCO25B,CDK1,IGFBP5,IQGAP1,ITGB1,MAD1L1,MYC,PPP3CA,TP2A                                                                                                                                                                                                                                                                                                                                                                                                                                                                                                                                                                                                                                                                                                                                                                                                                                                                                                                                                                                                                                                                                                                                                                                                                                                                                                                                                                                                                                                                                                                                                                                                                                                                                                |
| CIITA              | -0.729    | transcription regulator | Inhibited                  | -2.082             | 2.25E-01           | CCND1,CD74,GCNT2,HLA-B,HLA-DMB,HLA-DPA1,HLA-DQB1,HLA-DRA,IL10                                                                                                                                                                                                                                                                                                                                                                                                                                                                                                                                                                                                                                                                                                                                                                                                                                                                                                                                                                                                                                                                                                                                                                                                                                                                                                                                                                                                                                                                                                                                                                                                                                                                                                                                         |
| FLI1               |           | transcription regulator | Inhibited                  | -2.028             | 5.19E-01           | CCND1,CCND3,CTGF,DNMT1,EGR1,ID2,IMP4,NHP2L1,NIP7,RARB,SNRBP,SRGN,TCP1,TNC                                                                                                                                                                                                                                                                                                                                                                                                                                                                                                                                                                                                                                                                                                                                                                                                                                                                                                                                                                                                                                                                                                                                                                                                                                                                                                                                                                                                                                                                                                                                                                                                                                                                                                                             |

**Table S2. Upstream regulator analysis by IPA on differentially expressed genes in Me71 NFATc2-shRNA\_86a transfectant compared to two control transfectants**

**B. NFATc2 shRNA\_86a compared to Control\_shRNA\_2**

| Upstream Regulator | Log Ratio | Molecule Type           | Predicted Activation State | Activation z-score | p-value of overlap | Target molecules in dataset                                                                                                                                                                                                                                                                                                                                                                                                                                                                                                                                                                                                                                                                                                                                                                                                                                                                                                                                                                                                                                                                                                                                                                                                                                                                                                                                                                                                                                                                                                                                                                                                                                                                                                                                                                                                                                                                                                                                                 |
|--------------------|-----------|-------------------------|----------------------------|--------------------|--------------------|-----------------------------------------------------------------------------------------------------------------------------------------------------------------------------------------------------------------------------------------------------------------------------------------------------------------------------------------------------------------------------------------------------------------------------------------------------------------------------------------------------------------------------------------------------------------------------------------------------------------------------------------------------------------------------------------------------------------------------------------------------------------------------------------------------------------------------------------------------------------------------------------------------------------------------------------------------------------------------------------------------------------------------------------------------------------------------------------------------------------------------------------------------------------------------------------------------------------------------------------------------------------------------------------------------------------------------------------------------------------------------------------------------------------------------------------------------------------------------------------------------------------------------------------------------------------------------------------------------------------------------------------------------------------------------------------------------------------------------------------------------------------------------------------------------------------------------------------------------------------------------------------------------------------------------------------------------------------------------|
| TBX2               |           | transcription regulator | Inhibited                  | -4.933             | 1.90E-15           | ANLN,ASF1B,ATF3,AURKA,AURKB,BHLHE40,BUB1,CCNA2,CCNL1,CCNL2,CD6,CDCA3,CDCA5,CDK1,CDKN1A,CDKN2C,CDT1,CHAF1B,CHEK1,CKAP2,CKS1B,DPB,DNMT1,E2F7,E2F8,EZH2,FAM120B,FOXM1,HAUS1,HELLS,HEY1,LIG1,MAD2L1,MCM2,MCM4,MCM5,MCM7,MED20,MXD3,NCAPD2,NCAPG2,PARD6A,PAXBP1,PCGF6,PKMYT1,PLK1,PRC1,RBL1,RBM39,SGOL1,SMC2,SRF,TCEA2,TIPIN,TYRP1,ZNF329                                                                                                                                                                                                                                                                                                                                                                                                                                                                                                                                                                                                                                                                                                                                                                                                                                                                                                                                                                                                                                                                                                                                                                                                                                                                                                                                                                                                                                                                                                                                                                                                                                        |
| FOXM1              | -0.961    | transcription regulator | Inhibited                  | -4.37              | 2.42E-05           | ANXA1,ATF2,AURKB,BIRC5,BUB1B,CCNA2,CCNB1,CCNB2,CCND1,CCNE1,CCNE2,CCNF,CDC20,CDC25A,CDC25B,CDK1,CDK2,CDKN1A,CDKN3,CENPA,CENPF,CKS1B,FOXM1,GTSE1,KDR,KIF20A,MYC,NEDD4,NEK2,PLK1,PLK4,PRC1,SKP2,SNAI2,STMN1,TJP1,TP53,ZEB2                                                                                                                                                                                                                                                                                                                                                                                                                                                                                                                                                                                                                                                                                                                                                                                                                                                                                                                                                                                                                                                                                                                                                                                                                                                                                                                                                                                                                                                                                                                                                                                                                                                                                                                                                     |
| MYC                | -0.58     | transcription regulator | Inhibited                  | -4.228             | 2.33E-13           | ACSL4,ACTN1,ACTN4,ADARB1,ADD1,ADIPOR1,ADK,ADM,AKZ,AKAP12,ALCAM,AMD1,ANGPT1,ARL6IP1,ASNS,ATF4,ATPIF1,AURKB,BAX,BCKDHB,BCL2,BCL2A1,BCL2L1,BIN1,BIRC2,BIRC5,BMI1,BOPI,BRCA1,BUB1,BUB1B,CANX,CASP1,CASP9,CAST,CCNA2,CCNB1,CCNB2,CCND1,CCND3,CCNE1,CCNE2,CCNG2,CD44,CD47,CD9,CDC20,CDC25A,CDC25B,CDC25C,CDK1,CDK11A/CDK11B,CDK2,CDK6,CDK7,CDKN1A,CEBPD,CFLAR,CHEK1,CHKA,CKS2,COL15A1,COL4A2,COL5A2,COL6A3,COX5B,COX6A1,CPD,CPT1A,CPT2,CRIP2,CRYAB,CSR2,CTBS,CTNBN1,CTS,CTSD,CTSV,CUL1,CYFIP2,DBI,DBN1,DDX18,DDX21,DDX5,DKK1,DLEU2,DNMT1,DNPH1,DSTN,DUSP6,E2F2,E2F3,ECM1,EED,EGLN1,EGR1,EIF2B4,EIF2S1,EIF2S2,EIF3D,EIF3G,EIF4G1,EMP1,ENO1,ERBB2,EXOSC8,EZH2,F2R,FABP5,FAM129A,FAP,FBL,FBLN5,FBXO3,FCGRT,FOSL1,FOXM1,FSTL1,FTH1,FXDY1,GAA,GADD45A,GAMT,GAPDH,GAR1,GAS1,GCLC,GCSH,GGH,GLG1,GLS,GLUD1,GM2A,GOLGA2,GPI,GTFF2F2,H2AFZ,HAS2,HBE1,HERC5,HIST1H4A (includes others),HK2,HLA-E,HMGA1,HMGN2,HMOX1,HNRNP1A,HNRNPAB,HSPA14,HSPA1A/HSPA1B,HSPB1,HSPE1,ICAM1,IDI1,IDI2,IDI3,IDIH2,IER3,IFI35,IFIT1,IL1RAP,IL8,IMPA2,IREB2,IRF7,IRF9,ITGA6,ITGB1,ITM2B,KDR,KLF10,KLF4,KLF6,KRAS,LAMB2,LDHA,LIM S1,LIN28B,LSM4,LUM,LXN,MAD2L1,MAN2A1,MCM5,MCM7,MGAT1,MIF,MINA,MIR17HG,MITF,MKI67,MNT,MOGS,MRE11A,MRPL12,MSH2,MSN,MT1E,MTBP,MTF2,MTRF2,MTHFD1,MTHFR,MYC,MYO1C,NAP1L1,NBN,NCL,NDEL1,NDRG1,NDRG2,NFATC3,NGFRAP1,NME1,NME2,NOP56,OAS1,ODC1,OLIG1,PAICS,PAK2,PAM,PCNA,PFKFB3,PFKM,PFKP,PGAM1,PGK1,PHB,PLA1A,PLK1,PLP1,PMAIP1,PMP22,PNCK,PNO1,POLD1,POLR1B,PPP1CC,PPP1R15A,PRDX2,PRDX3,PREP,PRKACB,PRODH,PROM1,PSAT1,RAB40B,RAD51,RANBP1,RARA,RBBP4,RCC1,RHOB,RHPN1,ROCK2,RPL13,RPL21,RPL6,RPL7,RPS15A,RPS18,RPS27,RRM2,RRM2B,RRS1,RTN2,RUVBL2,SAT1,SCPEP1,SDCBP,SEPHS2,SERINC3,SFRP1,SGK1,SHMT1,SKP2,SLC1A5,SLC2A1,SLC2A3,SLC3A1,SLC3A2,SLC7A5,SMS,SNRPC,SNRPD1,SNRPN,SOD2,SOX6,SOX9,SPP1,ST3GAL1,STMN1,SUMO2,TAF1D,TAGLN2,TDG,TEF,TF,TFDP1,THBS1,TMEM97,TMSB10/TMSB4X,TNC,TNFRSF10B,TP53,TP53I3,TPD52,TRIP12,TSPAN7,TXNIP,TYMS,UBE2C,UXT,VAMP3,VAR5,XRCC3,YRDC,YY1,ZFP36,ZFP36L1,ZIC2 |
| E2F1               |           | transcription regulator | Inhibited                  | -3.152             | 2.11E-18           | AMY2A,ATM,AURKA,AURKB,BAX,BCL2,BCL2L11,BIRC5,BMI1,BMP4,BNIP3,BOK,BRCA1,BUB3,CALD1,CALM1 (includes others),CASP7,CASP9,CBX5,CCNA2,CCNB1,CCNB2,CCND1,CCND3,CCNE1,CCNE2,CCNO,CD9,CDC25A,CDC45,CDK1,CDK2,CDKN1A,CDKN2C,CDKN2D,CFLAR,CHEK1,CHEK2,CULIC1,COPS8,COX411,COX7C,CRABP2,CRYAB,CTN NBIP1,CTSB,DFB4,DDAH2,DGKI,DHFR,DLEU2,DNMT1,DUSP10,DUSP4,DUT,E2F2,E2F3,E2F4,ECT2,EED,EGR1,EIF3,ENO2,EXOSC9,EYA4,EZH2,FBXO5,FEN1,FGFR1,FHIT,FOXM1,GM2A,GMNN,GPS2,H19,HADHA,HELLS,HES1,HIST1H2AC,HIST1H2B/HIST1H2BK,HIST1H4A (includes others),HIST2H2AA3/HIST2H2AA4,HLTF,HMGA1,HMGB1,HMGB2,HRK,HSPA1A/HSPA1B,HSPE1,ICAM1,ID3,JMY,KDR,KIAA0101,KIF23,KRT10,LACTB,MAD2L1,MAF,MAP3K14,MAP3K5,MCL1,MCM10,MCM2,MCM4,MCM5,MCM7,MEIS1,MLH1,MMP16,MSH2,MT1G,MTHFD1,MYB,MYC,NCL,NCOA3,NDC80,NRIP1,NRP1,PA2G4,PAWR,PCNA,PHB,PMPCB,POLA2,POLD1,PPP1R13B,PPP1R8,PPT2,PRDM2,PRIM2,PRKDC,PSAT1,PSMD2,PTPN4,RACGAP1,RAD51,RANBP1,RBBP4,RBBP8,RBL1,RFC2,RFC3,RFC4,RPA3,RRM1,RRM2,RYBP,SIVA1,SLC3A2,SMC4,SNRPC,SOD2,STMN1,TAP1,TAPBP,TK1,TNFSF9,TP2A,TP2B,TP53,TP53BP2,TP53INP1,TRAF2,TYMS,UNG,UXT,VEGFB,ZFP36,ZNF160,ZNF22                                                                                                                                                                                                                                                                                                                                                                                                                                                                                                                                                                                                                                                                                                                                                                                                                                                                            |
| E2F3               | -0.257    | transcription regulator | Inhibited                  | -2.868             | 8.36E-09           | BIRC5,BMI1,BOK,CCNA2,CCNB1,CCND1,CCND3,CCNE1,CDC25A,CDCA4,CDK1,CDK2,CDKN1A,DHFR,E2F2,E2F3,EED,EZH2,FBXO5,MCM10,MCM2,MCM4,MCM5,MCM7,MIR17HG,MLH1,MT1G,MYB,MYC,PCNA,POLA2,PPP1R13B,PPP1R8,RAD51,RBL1,RRM1,STAG3,TK1,TP2B,TP53BP2,UXT                                                                                                                                                                                                                                                                                                                                                                                                                                                                                                                                                                                                                                                                                                                                                                                                                                                                                                                                                                                                                                                                                                                                                                                                                                                                                                                                                                                                                                                                                                                                                                                                                                                                                                                                          |
| TRIM24             | -0.312    | transcription regulator | Inhibited                  | -2.812             | 1.73E-02           | AGRN,BST2,DDX58,DHX58,EIF5A,GBP2,GLUL,HERC6,IFI27L2,IFI35,IFI44,IFIH1,IFIT2,IFIT3,IFNGR1,IFNGR2,IRF7,IRF9,ISG15,KIAA0101,LGALS3BP,NMI,NUMA1,OAS1,PACIN3,PARP12,PLEC,S100A11,SAMD9L,SHISA5,SOCS2,SPP1,STAT1,STAT2,TAT2,TAP1,UBA7                                                                                                                                                                                                                                                                                                                                                                                                                                                                                                                                                                                                                                                                                                                                                                                                                                                                                                                                                                                                                                                                                                                                                                                                                                                                                                                                                                                                                                                                                                                                                                                                                                                                                                                                             |
| EZH2               | -1.052    | transcription regulator | Inhibited                  | -2.698             | 2.72E-02           | AADAT,ALPL,AMACR,APPBP2,AXIN2,BCL2,BCL2L11,BIRC3,BMP4,BRCA1,C15orf48,CCND1,CCND3,CCNE2,CD82,CDK6,CDKN1A,CPD,CTNNB1,CX3CL1,CXCL1,DENND2A,DKK1,EFNA1,EP300,ERBB2,EZH2,FBLN1,FHOD3,FOXF2,FRZB,FUCA1,GDF15,GSTM4,HOXB13,HOXB5,HOXB6,ICAM1,ICOSLG,IGFBP3,IL24,IL8,ITGA1,KIAA1199,KLF4,MAL2,MYC,MZF1,NME5,PAX3,PIM2,PKMYT1,PLA2G4A,PPP2C8,PRICKLE1,PTGES,PTGS2,RAC3,RAP1GAP,RBM5,SCAMP2,SCP2,SH3BP4,TFX3,TP53,TRIM38,WTAP,ZMYM4                                                                                                                                                                                                                                                                                                                                                                                                                                                                                                                                                                                                                                                                                                                                                                                                                                                                                                                                                                                                                                                                                                                                                                                                                                                                                                                                                                                                                                                                                                                                                   |
| E2F2               | -0.364    | transcription regulator | Inhibited                  | -2.682             | 9.89E-09           | AMY2A,BCL2,BIRC5,BMI1,CCNA2,CCNB1,CCND1,CCND3,CCNE1,CDC25A,CDC45,CDK1,CDKN1A,CDKN2C,CDKN2D,DHFR,E2F3,EED,EZH2,JMY,MCM10,MCM2,MCM4,MCM5,MCM7,MLH1,MT1G,MYB,MYC,PCNA,RAD51,RBL1,RRM2,TP2B,TP53,UXT                                                                                                                                                                                                                                                                                                                                                                                                                                                                                                                                                                                                                                                                                                                                                                                                                                                                                                                                                                                                                                                                                                                                                                                                                                                                                                                                                                                                                                                                                                                                                                                                                                                                                                                                                                            |
| TLX1               |           | transcription regulator | Inhibited                  | -2.646             | 3.27E-01           | CDK6,CHEK1,ERBB2,KDR,MCL1,MYB,NMI,PCNA,RAD51                                                                                                                                                                                                                                                                                                                                                                                                                                                                                                                                                                                                                                                                                                                                                                                                                                                                                                                                                                                                                                                                                                                                                                                                                                                                                                                                                                                                                                                                                                                                                                                                                                                                                                                                                                                                                                                                                                                                |
| KLF5               |           | transcription regulator | Inhibited                  | -2.538             | 1.89E-01           | ACADM,BIRC5,CCND1,CDK1,CDKN1A,CDT1,CTNNB1,E2F3,FAM110A,LAMA1,MYC,NOTCH1,PCNA,PPARG,RUNX1,TBC1D14,WFS1                                                                                                                                                                                                                                                                                                                                                                                                                                                                                                                                                                                                                                                                                                                                                                                                                                                                                                                                                                                                                                                                                                                                                                                                                                                                                                                                                                                                                                                                                                                                                                                                                                                                                                                                                                                                                                                                       |
| TCF4               |           | transcription regulator | Inhibited                  | -2.519             | 2.49E-02           | BIRC5,CCND1,CDKN1A,DCT,DKK1,ELF4,ID2,IGFBP2,JUN,MIA,MITF,MYB,MYC,NCOR2,NOS2,PITX2,PSD3,SGK1,SOX9,TCF7L2,TYR,TYRP1                                                                                                                                                                                                                                                                                                                                                                                                                                                                                                                                                                                                                                                                                                                                                                                                                                                                                                                                                                                                                                                                                                                                                                                                                                                                                                                                                                                                                                                                                                                                                                                                                                                                                                                                                                                                                                                           |
| POU5F1             |           | transcription regulator | Inhibited                  | -2.47              | 8.01E-02           | ASH2L,BIRC5,BMI1,BRCA1,CCND1,CCNF,CDKN1A,DLX5,DNMT1,FOXA1,GADD45A,GOLGA6C (includes others),HOXB3,HOXC4,IER5,ISL1,KLF2,KLF4,LHX2,MEF2A,MEIS1,MTF2,ONECUT1,ORAI1,OTP,PCGF6,PHB,PHC3,PMAIP1,RARA,SPP1,TBX3,TDTRD7,TF,TP53,ZFH3                                                                                                                                                                                                                                                                                                                                                                                                                                                                                                                                                                                                                                                                                                                                                                                                                                                                                                                                                                                                                                                                                                                                                                                                                                                                                                                                                                                                                                                                                                                                                                                                                                                                                                                                                |
| MBD2               |           | transcription regulator | Inhibited                  | -2.458             | 9.23E-02           | AMY1A (includes others),ATP51,BIRC3,BRCA1,CDKN1A,CENPH,CKS2,COX6C,G6PD,GSTP1,HK2,MEF2A,MGMT,NBR2,NEIL3,ORC6,PAK2,PLA2G16,PLK1,POLB,PTPN4,RELB                                                                                                                                                                                                                                                                                                                                                                                                                                                                                                                                                                                                                                                                                                                                                                                                                                                                                                                                                                                                                                                                                                                                                                                                                                                                                                                                                                                                                                                                                                                                                                                                                                                                                                                                                                                                                               |
| MYBL2              |           | transcription regulator | Inhibited                  | -2.318             | 4.07E-03           | BCL2,BCL2L11,BIRC3,BIRC5,CCNA2,CCNB1,CCNB2,CCND1,CDC25B,CDK1,CDK2,IGFBP5,IQGAP1,ITGB1,MAD1L1,MYC,PPP3CA,SLC1A5,TP2A                                                                                                                                                                                                                                                                                                                                                                                                                                                                                                                                                                                                                                                                                                                                                                                                                                                                                                                                                                                                                                                                                                                                                                                                                                                                                                                                                                                                                                                                                                                                                                                                                                                                                                                                                                                                                                                         |
| SREBF2             |           | transcription regulator | Inhibited                  | -2.291             | 1.53E-05           | AACS,ABCA1,ACACA,ACSL1,ACSS2,ALDOC,CDKN1A,CYP51A1,DBI,EBP,ELOVL6,FABP5,FDFT1,FDPS,G6PD,GTG21,HE6G,HMGR,HMGS1,HSD17B1,IDI1,IDI2,INSIG1,LDLR,LSS,MSMO1,MVD,MVK,NSDHL,PLIN2,RDH11,SC5D,SCD,SOLE,SRBF1,TF3,TM7SF2,TMEM97                                                                                                                                                                                                                                                                                                                                                                                                                                                                                                                                                                                                                                                                                                                                                                                                                                                                                                                                                                                                                                                                                                                                                                                                                                                                                                                                                                                                                                                                                                                                                                                                                                                                                                                                                        |
| MED13              | 0.258     | transcription regulator | Inhibited                  | -2.121             | 3.82E-01           | AACS,ACACA,CIB2,CLSTN3,ELOVL6,ENO1,GPD2,PPARG                                                                                                                                                                                                                                                                                                                                                                                                                                                                                                                                                                                                                                                                                                                                                                                                                                                                                                                                                                                                                                                                                                                                                                                                                                                                                                                                                                                                                                                                                                                                                                                                                                                                                                                                                                                                                                                                                                                               |
| GLI3               |           | transcription regulator | Inhibited                  | -2.059             | 4.98E-01           | BCL2,BMP4,CCND1,EMX2,GLI2,H2AFX,HOXD11,PTCH1,PVR,SALL1,SFRP1,SOX9,WNT5A                                                                                                                                                                                                                                                                                                                                                                                                                                                                                                                                                                                                                                                                                                                                                                                                                                                                                                                                                                                                                                                                                                                                                                                                                                                                                                                                                                                                                                                                                                                                                                                                                                                                                                                                                                                                                                                                                                     |



|      |                         |           |        |          |                                                                                             |
|------|-------------------------|-----------|--------|----------|---------------------------------------------------------------------------------------------|
| FLI1 | transcription regulator | Inhibited | -2.037 | 3.22E-01 | CCND1,CCND3,CTGF,DDX21,DNMT1,EGR1,ID2,IMP4,NHP2L1,NIP7,NOL6,POLR1D,RARB,SNRPB,SRGN,TCP1,TNC |
|------|-------------------------|-----------|--------|----------|---------------------------------------------------------------------------------------------|

**Legend to Supplementary Table S2 A,B.** Whole genome gene expression analysis of NFATc2\_shRNA\_86a and of two control transfectants (control shRNA\_1 and \_2) from Me71 was carried out as described in ref. 35, by single-color hybridization of RNAs performed on Illumina Bead Chip HumanHT-12\_v4 Microarrays (Illumina). The expression profiles have been deposited in NCBI's Gene Expression Omnibus (GEO) with GSE accession number GSE101323. Differentially expressed genes in NFATc2 shRNA\_86a transfectant compared to control-shRNA\_1 (A) and control-shRNA-2 (B) transfectants were identified as described in ref 35 by BRBarray Tools (Vers.4.3.0) software. Ingenuity Pathway Analysis (IPA 8.5, [www.ingenuity.com](http://www.ingenuity.com)) was used to carry out "upstream regulator analysis" on differentially expressed genes. Upstream regulator analysis allows to identify the upstream transcriptional regulators that can explain the observed gene expression changes in the dataset. This computational tools returns results based on pvalues and Z score statistics. P values indicate the likelihood of the overlap between the genes in the dataset and those that are regulated by a predicted transcription factor. Negative Z score statistics (only those <-2 are considered significant and shown) are used to infer the "inhibited" the activation states of the predicted transcription factors.

**Supplementary Table 3. Antibodies for Western Blot analysis.**

| <b>Protein</b>                                                                            | <b>Host</b> | <b>Catalog no</b> | <b>Company</b>               |
|-------------------------------------------------------------------------------------------|-------------|-------------------|------------------------------|
| NFATc2                                                                                    | mouse       | 610703            | BD Transduction Laboratories |
| E-cadherin                                                                                | mouse       | 610181            | BD Transduction Laboratories |
| ZEB1                                                                                      | rabbit      | 3396              | Cell Signaling               |
| c-myc                                                                                     | rabbit      | 5605              | Cell Signaling               |
| Snail                                                                                     | rabbit      | 3879              | Cell Signaling               |
| Tri-Methyl-Histone H3 (Lys 27)                                                            | rabbit      | 9733              | Cell Signaling               |
| EZH2                                                                                      | rabbit      | 5246              | Cell Signaling               |
| N-cadherin                                                                                | rabbit      | 13116             | Cell Signaling               |
| AXL                                                                                       | rabbit      | 4939              | Cell Signaling               |
| MITF clone C5                                                                             | mouse       | ab80651           | Abcam                        |
| CTNNAL1                                                                                   | mouse       | H00008727-B01P    | Abnova                       |
| Twist                                                                                     | rabbit      | sc-15393          | Santa Cruz Biotechnology     |
| ZEB2                                                                                      | mouse       | sc-271984         | Santa Cruz Biotechnology     |
| FOXM1                                                                                     | rabbit      | sc-500            | Santa Cruz Biotechnology     |
| ATF3                                                                                      | rabbit      | sc-188            | Santa Cruz Biotechnology     |
| $\beta$ -actin                                                                            | rabbit      | A2066             | Sigma-Aldrich                |
| vinculin                                                                                  | mouse       | V9131             | Sigma-Aldrich                |
| $\alpha$ -tubulin                                                                         | mouse       | CP06              | Calbiochem, Merck            |
| DNA Topoisomerase I                                                                       | mouse       | 556597            | BD Pharmingen                |
| STAT3                                                                                     | mouse       | 9139              | Cell Signaling               |
| pSTAT3                                                                                    | rabbit      | 4074              | Cell Signaling               |
| ERK 1/2                                                                                   | mouse       | 9107              | Cell Signaling               |
| pERK 1/2                                                                                  | rabbit      | 4370              | Cell Signaling               |
| ECL Anti-rat IgG, Horseradish Peroxidase-Linked species specific whole antibody from goat | goat        | NA935             | Ge Healthcare                |
| anti-mouse IgM                                                                            | rat         | 553435            | BD Pharmingen                |
| anti-mouse IgG                                                                            | goat        | NA931             | Ge Healthcare                |
| anti-rabbit IgG                                                                           | rabbit      | NA934             | Ge Healthcare                |

**Supplementary Table 4. Taqman Gene Expression Assays**

| <b>Gene</b>   | <b>Assay ID</b> |
|---------------|-----------------|
| AXL           | Hs00242357_m1   |
| ZEB1          | Hs00232783_m1   |
| MITF          | Hs01117294_m1   |
| NFATc2        | Hs00905451_m1   |
| SNAI1         | Hs00195591_m1   |
| CDH1          | Hs01013958_m1   |
| CDH2          | Hs00983056_m1   |
| EZH2          | Hs00544830_m1   |
| GAPDH         | Hs99999905_m1   |
| GUSB          | Hs99999908_m1   |
| HPRT1         | Hs99999909_m1   |
| TBX3          | Hs01110714_m1   |
| ITGB3         | Hs00173978_m1   |
| NRP1          | Hs00826129_m1   |
| CTGF          | Hs01026927_g1   |
| DDR2          | Hs01025953_m1   |
| FSTL1         | Hs00907505_m1   |
| AHNAK         | Hs01102463_m1   |
| PVRL3/NECTIN3 | Hs00210045_m1   |
| PRR16         | Hs00706472_s1   |
| KDR           | Hs00911700_m1   |
| DSP           | Hs00950591_m1   |
| QPCT          | Hs01598354_m1   |

**Supplementary Table 5. Stealth Select RNAi siRNA oligos**

| Target gene | assay ID  | Sequence 5' to 3'                                       | catalog no | Company                 |
|-------------|-----------|---------------------------------------------------------|------------|-------------------------|
| NFATc2      | HSS107111 | UCUACGUCAUCAUUGGGAAGAGAAA<br>UUUCUCUUCUCCAUUGAUGACGUAGA | 1299003    | ThermoFisher Scientific |
|             | Hss107112 | GGGUGACCAUUAACAGGAGCAGAA<br>UUCUGCUCCUGUUUAAUGGUCACCC   | 1299003    |                         |
| c-myc       | HSS106837 | CAGCGACUCUGAGGAGGAACAAGAA<br>UUCUUGUUCUCCUCAGAGUCGCUG   | 1299003    |                         |
|             | HSS106839 | CCAACAGGAACUAUGACCUCGACUA<br>UAGUCGAGGUCAUAGUCCUGUUGG   | 1299003    |                         |
| FOXM1       | HSS103712 | CCCUGCCCAACAGGAGUCUAAUCAA<br>UUGAUUAGACUCCUGUUGGGCAGGG  | 1299003    |                         |
|             | HSS103713 | GCCAUGAUACA AUUCGCCAUCAACA<br>UGUUGAUGGCGAAUUGUAUCAUGGC | 1299003    |                         |
| EZH2        | HSS176652 | GACCACAGUGUUACCAGCAUUUGGA<br>UCCAAAUGCUGGUAACACUGUGGUC  | 1299003    |                         |
|             | HSS176653 | GAGCAAAGCUUACACUCCUUUCAUA<br>UAUGAAAGGAGUGUAAGCUUUGCUC  | 1299003    |                         |

**Supplementary Table 6. Antibodies for immunohistochemistry**

| <b>Protein</b> | <b>Host</b> | <b>Catalog no</b> | <b>Company</b>           |
|----------------|-------------|-------------------|--------------------------|
| NFATc2         | rabbit      | HPA024369         | Sigma-Aldrich            |
| AXL            | goat        | AF154             | R&D Systems              |
| MITF           | mouse       | M3621             | DAKO/Agilent             |
| EZH2           | rabbit      | 5246              | Cell Signaling           |
| ZEB1           | rabbit      | sc-25388          | Santa Cruz Biotechnology |
| N-cadherin     | mouse       | M3613             | DAKO                     |
